# Supplementary material
Source: PubMed Central journal article supplement (PMC2677560)
Supplement: NIHMS102551-supplement-supplement_1.pdf [file NIHMS102551-supplement-supplement_1.pdf]

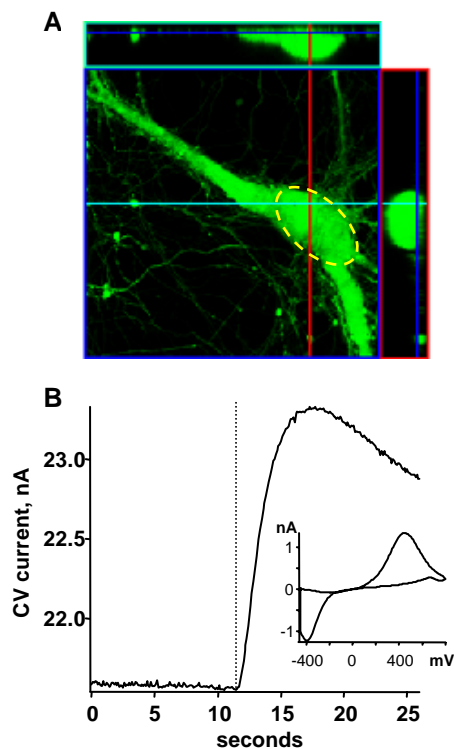

**Figure S1. IPE measurements from TH-GFP neurons.**

**A.** Pseudo-3D image of a live ventral midbrain GFP-positive neuron from TH-GFP mice. Insets on the top and right show vertical sections of the neuron at planes indicated by the blue and red lines, respectively. An approximation of neuronal soma is shown as yellow oval.

**B.** Representative cyclic voltammetry trace from GFP-positive neuron treated with 100  $\mu$ M L-DOPA for 1h; the current was sampled at 450 mV. Cell membrane rupture is indicated by the dotted line. The inset shows a typical catecholamine voltammogram taken at the maximum of DA oxidation wave.

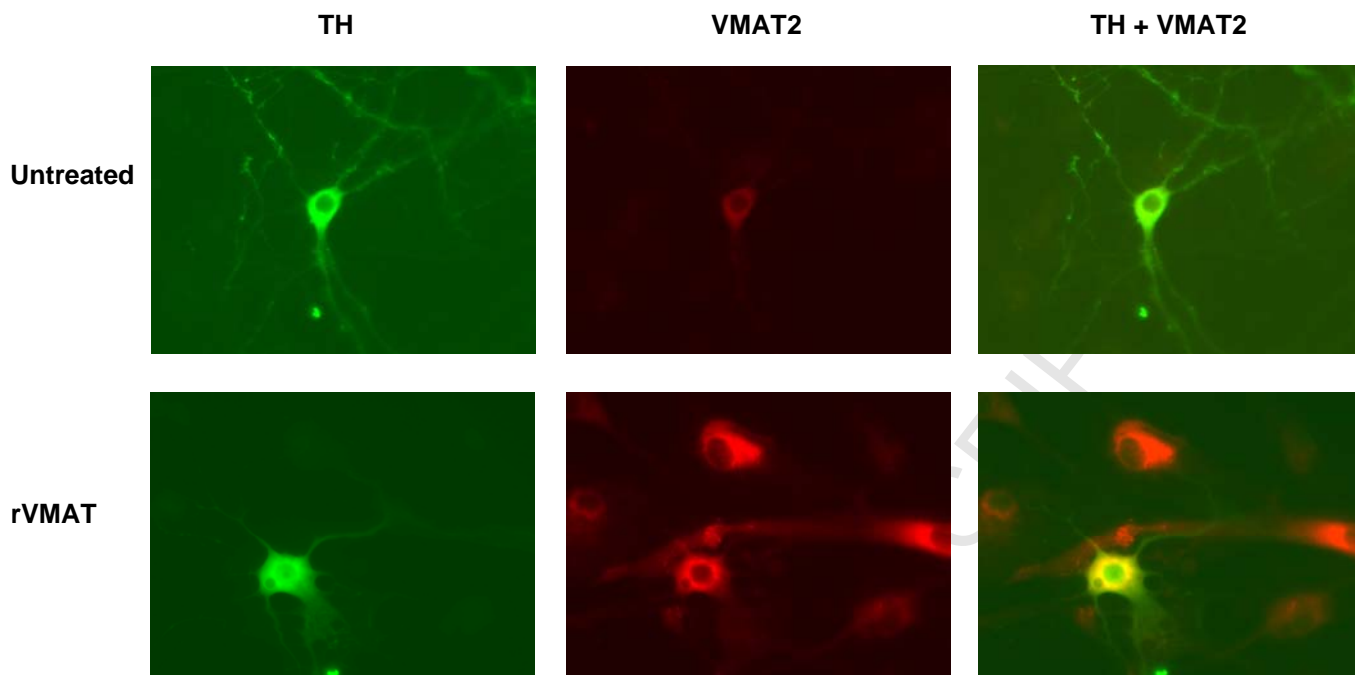

### Figure S2. Overexpression of VMAT2 in ventral midbrain neurons.

Representative images of mouse VM neurons (7-day post-plating) infected with rVMAT and double-stained for TH (green) and VMAT2 (red). Overlaid fluorescent images show complete colocalization of the two fluorescent markers in untreated neurons. Cultures exposed to rVMAT2 show increased VMAT2 immunofluorescence in the cell bodies of TH<sup>+</sup> neurons, as well as an expression of the protein in non-dopaminergic cells.

As previously published<sup>1</sup>, expression of rVMAT2 was confirmed by immunostaining for both VMAT2 and the HA epitope placed in the luminal loop between TMDs 1 and 2 that does not interfere with transporter activity or its subcellular localization. Overexpression of VMAT2 in VM neurons increased the overall transporter levels measured by western blot, and enhanced the depolarization-evoked release of DA and the total intracellular DA by ~2-fold relative to control cells as assessed by HPLC-EC<sup>2</sup>. Transfection efficiency reached 80-90% with expression of VMAT2 protein observed in both dopaminergic and non-dopaminergic neurons.

1. Krantz, D. E., Peter, D., Liu, Y. & Edwards, R. H. Phosphorylation of a vesicular monoamine transporter by casein kinase II. *J Biol Chem* 272, 6752-6759 (1997).
2. Pothos, E. N. et al. Synaptic vesicle transporter expression regulates vesicle phenotype and quantal size. *J Neurosci.* 20, 7297-306. (2000).

TH

Calbindin

Ca<sub>v</sub>1.3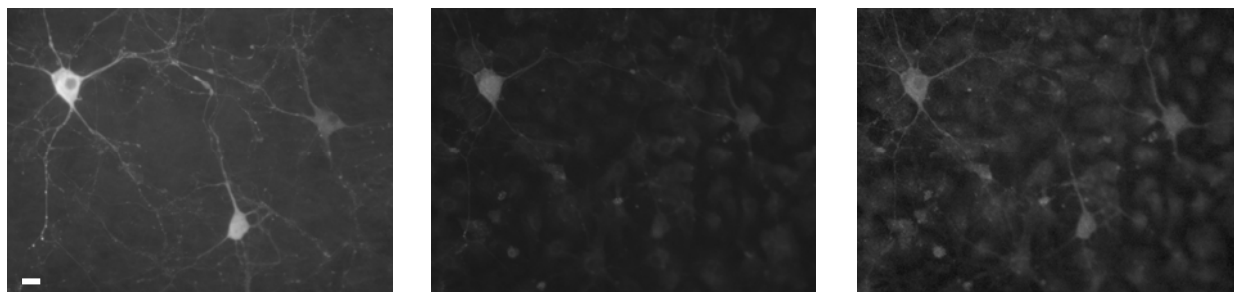**Figure S3. Immunocytochemistry of Ca<sub>v</sub>1.3 channel in SN and VTA neurons.**

Mouse VM neurons were fixed and stained for TH, calbindin and the  $\alpha$ 1D subunit of the L-type Ca<sup>2+</sup> channels, which is uniquely present in the Ca<sub>v</sub>1.3 channel. No difference in the Cav1.3 staining was observed between SN (calbindin<sup>-</sup>) and VTA (calbindin<sup>+</sup>) DA neurons. Scale bar is 20 microns.

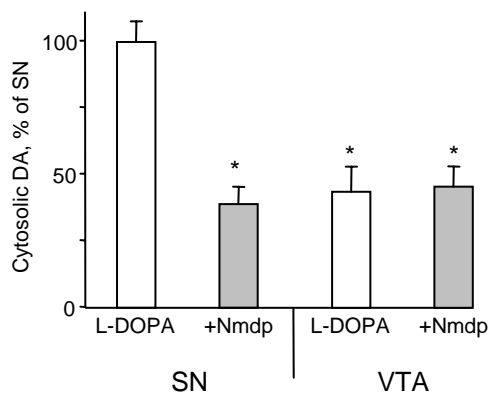

**Figure S4. Comparison of DA<sub>cyt</sub> in SN and VTA neurons before and after nimodipine treatment.**

SN and VTA neurons were pre-treated with 10  $\mu$ M nimodipine for 1h, and then exposed to 100  $\mu$ M L-DOPA for 1h. \* -  $p < 0.05$  vs. SN with L-DOPA only by one-way ANOVA.

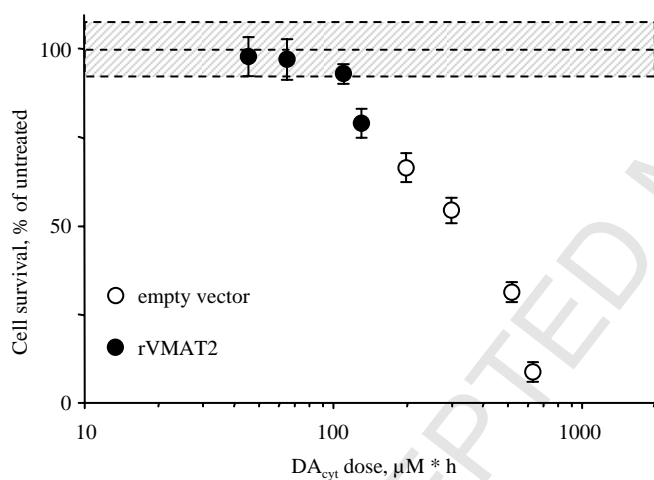

**Figure S5. Dependence of TH<sup>+</sup> neurons survival on DA<sub>cyt</sub> dose in VM cultures treated with rVMAT2.**

The dose of DA<sub>cyt</sub> exposure was calculated as described in Discussion, using IPE data from mouse VM neurons transfected with rVMAT2 or an empty vector (Figure 4A). Cell survival was determined in rat VM cultures transfected with empty vector or rVMAT2 and treated with 50, 100, 500 and 1000  $\mu$ M L-DOPA for 7 days. Dotted lines and shadowed boxes represent mean  $\pm$  SEM in untreated cells.
